# Supplementary material for: Postpartum versus postnatal period: Do the name and duration matter?
Source: PubMed Central journal article supplement (PMC11051636; doi:10.1371/journal.pone.0300118), 2024-04-26
Supplement: pone.0300118.s001.pdf [file pone.0300118.s001.pdf]

# S1 File

## Search Strategy

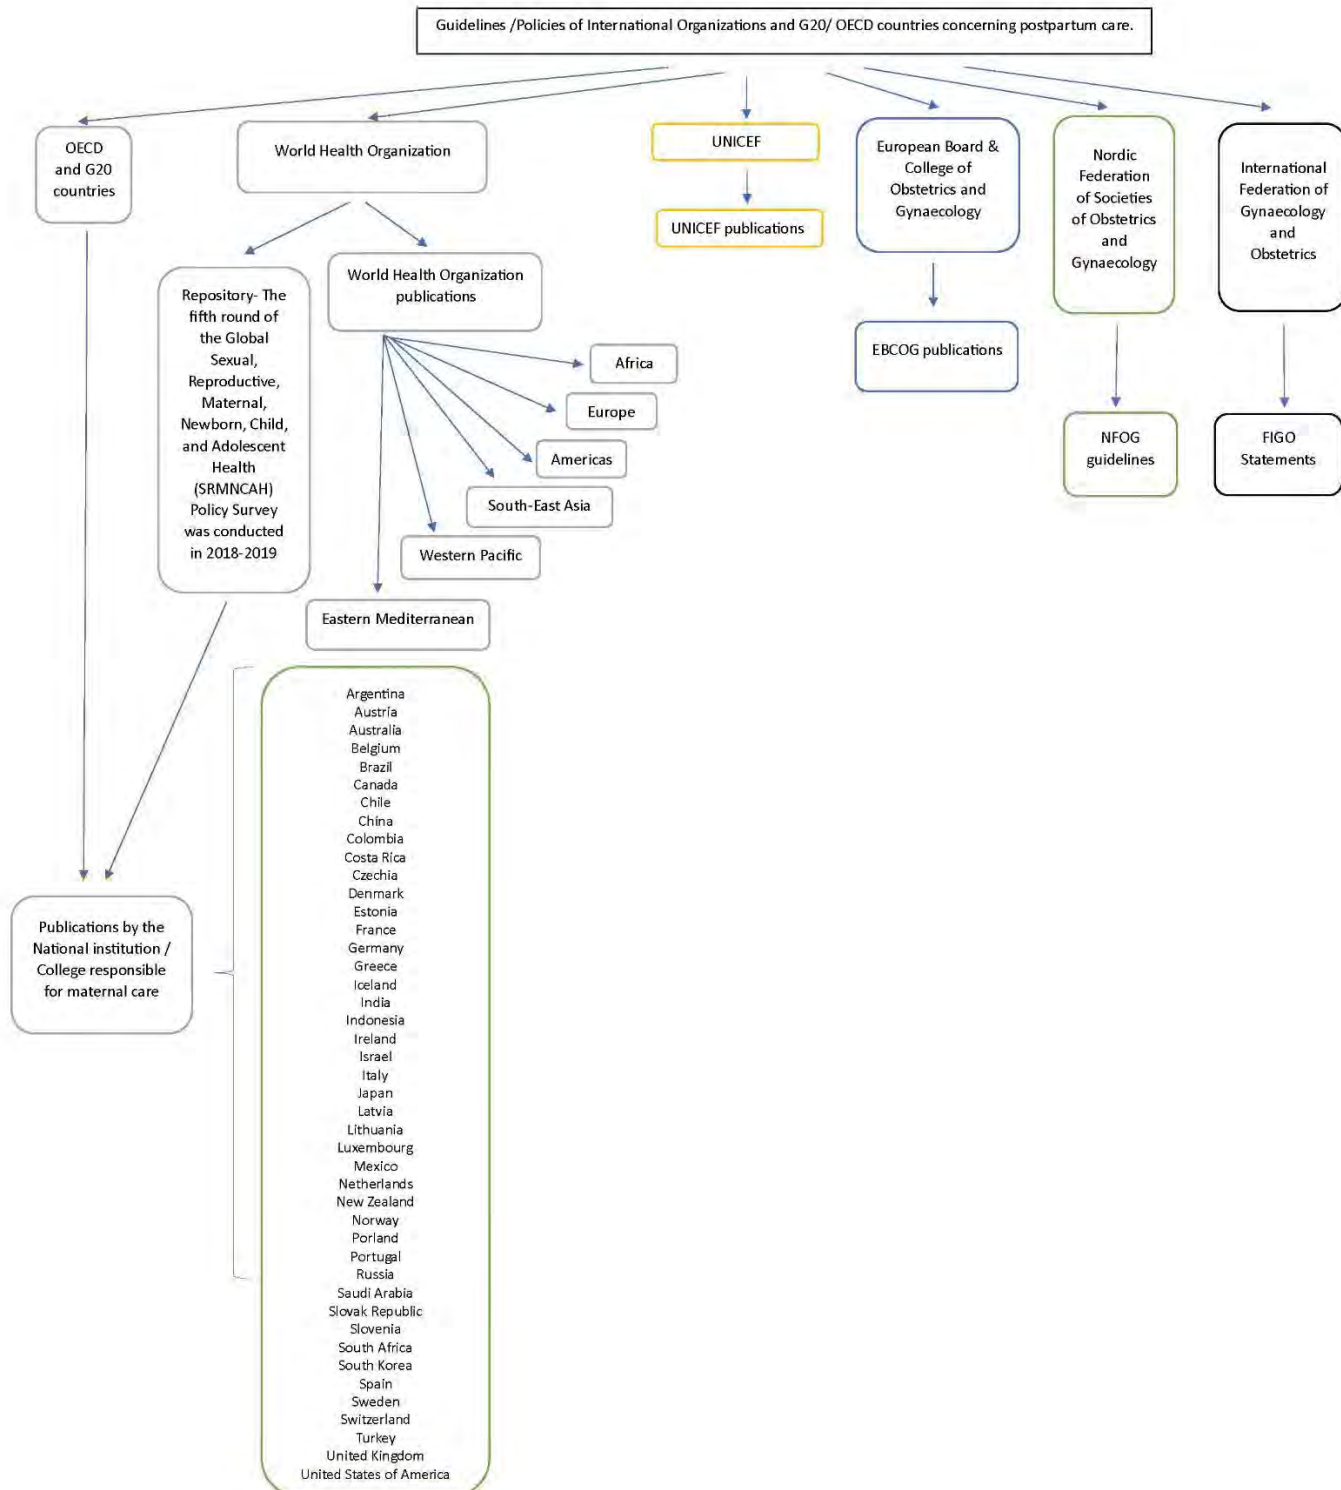

**Supplementary Figure 1: Types of Resources included to conduct the scoping review on guidelines on routine postpartum care by international organisations, G20 and OECD countries\*.**

\*OECD- Organisation for Economic Co-operation and Development, G 20- Group of 20, FIGO- International Federation of Gynaecology and Obstetrics, UNICEF- United Nations Children’s Fund, EBCOG- European Board & College of Obstetrics and Gynaecology, NFOG- Nordic Federation of Societies of Obstetrics and Gynaecology

**Supplementary Table 1.1: Search strategy to locate documents on routine postpartum care by different international organisations, G20 and OECD countries\*.**

| Organization                                                                                                                                            |                                                                                  | Search terms                                                                                                                                                                                                                                                                                      |
|---------------------------------------------------------------------------------------------------------------------------------------------------------|----------------------------------------------------------------------------------|---------------------------------------------------------------------------------------------------------------------------------------------------------------------------------------------------------------------------------------------------------------------------------------------------|
| <b>WHO Repository- The fifth round of the Global Sexual, Reproductive, Maternal, Newborn, Child, and Adolescent Health (SRMNCAH Policy Survey) (13)</b> |                                                                                  |                                                                                                                                                                                                                                                                                                   |
| 1                                                                                                                                                       | Postpartum                                                                       | 'Postpartum' AND 'Country'<br>Filters-Maternal and Newborn; English                                                                                                                                                                                                                               |
| 2                                                                                                                                                       | Postnatal                                                                        | 'Postnatal' AND 'Country'<br>Filters-Maternal and Newborn; English                                                                                                                                                                                                                                |
| 3                                                                                                                                                       | Interpregnancy                                                                   | 'Interpregnancy' AND 'Country'<br>Filters-Maternal and Newborn; English                                                                                                                                                                                                                           |
| 4                                                                                                                                                       | Interconception                                                                  | 'Interconception' AND 'Country'<br>Filters-Maternal and Newborn; English                                                                                                                                                                                                                          |
| 5                                                                                                                                                       | Maternal                                                                         | 'Maternal' AND 'Country'<br>Filters-Maternal and Newborn; English                                                                                                                                                                                                                                 |
| <b>WHO</b>                                                                                                                                              |                                                                                  |                                                                                                                                                                                                                                                                                                   |
| 1                                                                                                                                                       | WHO publications                                                                 | Keywords- 'Maternal health', 'Postpartum'<br>Publication type- Country Cooperation Strategy; Governing Bodies Documentation, Guidance, Guideline, handbook, Manual, Policy Brief, Meeting Report, Technical documentation, Standards<br>Publishing Offices-Any<br>Countries/Areas-Any<br>Year-Any |
| <b>UNICEF</b>                                                                                                                                           |                                                                                  |                                                                                                                                                                                                                                                                                                   |
| 1                                                                                                                                                       | UNICEF publications                                                              | Filters-Guidance; Publications; Maternal health; Newborn care                                                                                                                                                                                                                                     |
| <b>FIGO</b>                                                                                                                                             |                                                                                  |                                                                                                                                                                                                                                                                                                   |
| 1                                                                                                                                                       | FIGO Statements                                                                  | Filters-Maternal Health; Newborn Health                                                                                                                                                                                                                                                           |
| <b>European Board &amp; College of Obstetrics and Gynaecology (EBCOG)</b>                                                                               |                                                                                  |                                                                                                                                                                                                                                                                                                   |
| 1                                                                                                                                                       | EBCOG publications                                                               | Keywords-'Maternal', 'Postpartum', 'Postnatal', 'Interpregnancy', 'Interconception'                                                                                                                                                                                                               |
| <b>Nordic Federation of Societies of Obstetrics and Gynaecology</b>                                                                                     |                                                                                  |                                                                                                                                                                                                                                                                                                   |
| 1                                                                                                                                                       | Clinical Guidelines and Nordic Collaboration presented by NFOG                   | N/A                                                                                                                                                                                                                                                                                               |
| <b>National Guidelines</b>                                                                                                                              |                                                                                  |                                                                                                                                                                                                                                                                                                   |
| 1.                                                                                                                                                      | Publications by the National Institution / College responsible for maternal care | Keywords-'Maternal', 'Postpartum', 'Postnatal', 'Interpregnancy', 'Interconception'                                                                                                                                                                                                               |

\*OECD- Organisation for Economic Co-operation and Development, G 20- Group of 20, WHO- World Health Organization, FIGO- International Federation of Gynaecology and Obstetrics, UNICEF- United Nations Children's Fund, EBCOG- European Board & College of Obstetrics and Gynaecology

**Supplementary Table 1.2: Available guidelines/policies, frameworks among eligible organisations and countries**

| Country                                                            | Number of documents<br>(In all languages) | Number of documents<br>Published in English* | Number of documents<br>included in the review |
|--------------------------------------------------------------------|-------------------------------------------|----------------------------------------------|-----------------------------------------------|
| WHO                                                                | 49                                        | 49                                           | 10                                            |
| UNICEF                                                             | 4                                         | 4 (One duplicate with WHO)                   | 0                                             |
| European Board & College of<br>Obstetrics and Gynaecology          | 2                                         | 2                                            | 1                                             |
| The Nordic Federation of Societies of<br>Obstetrics and Gynecology | 0                                         | 0                                            | 0                                             |
| FIGO                                                               | 0                                         | 0                                            | 0                                             |
| Argentina                                                          | 2                                         | 0                                            | 0                                             |
| Austria                                                            | 1                                         | 0                                            | 0                                             |
| Australia                                                          | 4                                         | 4                                            | 1                                             |
| Belgium                                                            | 2                                         | 1                                            | 0                                             |
| Brazil                                                             | 1                                         | 0                                            | 0                                             |
| Canada                                                             | 1                                         | 1                                            | 1                                             |
| Chile                                                              | 0                                         | 0                                            | 0                                             |
| China                                                              | 2                                         | 0                                            | 0                                             |
| Colombia                                                           | 0                                         | 0                                            | 0                                             |
| Costa Rica                                                         | 0                                         | 0                                            | 0                                             |
| Czechia                                                            | 0                                         | 0                                            | 0                                             |
| Denmark                                                            | 1                                         | 0                                            | 0                                             |
| Estonia                                                            | 0                                         | 0                                            | 0                                             |
| France                                                             | 2                                         | 1                                            | 0                                             |
| Germany                                                            | 2                                         | 0                                            | 0                                             |
| Greece                                                             | 0                                         | 0                                            | 0                                             |
| Iceland                                                            | 0                                         | 0                                            | 0                                             |
| India                                                              | 7                                         | 7                                            | 5                                             |
| Indonesia                                                          | 1                                         | 0                                            | 0                                             |
| Ireland                                                            | 0                                         | 0                                            | 0                                             |
| Israel                                                             | 0                                         | 0                                            | 0                                             |
| Italy                                                              | 1                                         | 0                                            | 0                                             |
| Japan                                                              | 1                                         | 0                                            | 0                                             |
| Latvia                                                             | 0                                         | 0                                            | 0                                             |
| Lithuania                                                          | 0                                         | 0                                            | 0                                             |
| Luxembourg                                                         | 0                                         | 0                                            | 0                                             |
| Mexico                                                             | 8                                         | 0                                            | 0                                             |
| Netherlands                                                        | 1                                         | 0                                            | 0                                             |
| New Zealand                                                        | 0                                         | 0                                            | 0                                             |
| Norway                                                             | 1                                         | 0                                            | 0                                             |
| Porland                                                            | 0                                         | 0                                            | 0                                             |
| Portugal                                                           | 2                                         | 0                                            | 0                                             |
| Russia                                                             | 1                                         | 0                                            | 0                                             |
| Saudi Arabia                                                       | 1                                         | 0                                            | 0                                             |
| Slovak Republic                                                    | 0                                         | 0                                            | 0                                             |

|                          |   |   |   |
|--------------------------|---|---|---|
| Slovenia                 | 0 | 0 | 0 |
| South Africa             | 5 | 4 | 4 |
| South Korea              | 1 | 0 | 0 |
| Spain                    | 1 | 0 | 0 |
| Sweden                   | 3 | 0 | 0 |
| Switzerland              | 1 | 0 | 0 |
| Turkey                   | 1 | 0 | 0 |
| United Kingdom           | 2 | 2 | 2 |
| United States of America | 2 | 2 | 2 |

WHO- World Health Organization, UNICEF- United Nations Children's Fund; \*Several documents were omitted from the review either because they were restricted to a specific disease, or subtopic related to the postpartum period (e.g., guidelines only addressing postpartum haemorrhage, gestational diabetes, etc.) or could not be considered as a guideline or a strategy (e.g., Desk review, situation analysis, etc.)
