# Supplementary material for: Postpartum versus postnatal period: Do the name and duration matter?
Source: PubMed Central journal article supplement (PMC11051636; doi:10.1371/journal.pone.0300118), 2024-04-26
Supplement: pone.0300118.s002.pdf [file pone.0300118.s002.pdf]

**S1 Table: Summary of findings on routine postpartum care published by international organisations, G20 and OECD countries\***

| International body/country and Institution                                                              | Year of publication of the latest guideline/ Position Paper/ Strategy                              | Use of 'Postpartum' or 'Postnatal' term to refer to care/ services for the mother following delivery* |           | Postpartum length | Service length | Service frequency                                                                                                                                                        |
|---------------------------------------------------------------------------------------------------------|----------------------------------------------------------------------------------------------------|-------------------------------------------------------------------------------------------------------|-----------|-------------------|----------------|--------------------------------------------------------------------------------------------------------------------------------------------------------------------------|
|                                                                                                         |                                                                                                    | Postpartum                                                                                            | Postnatal |                   |                |                                                                                                                                                                          |
| Europe [1]<br>Obstetrics and Gynaecology<br>European Board & College<br>Obstetric and Neonatal Services | 2014<br>Obstetric and Neonatal Services<br>Standards of Care for Women's<br>Health in Europe       | +                                                                                                     | +         | Not given         | Not given      | Not given                                                                                                                                                                |
| WHO [2]                                                                                                 | 2022<br>WHO recommendations on<br>maternal and newborn care for a<br>positive postnatal experience | +                                                                                                     | +         | 6 weeks           | 6 weeks        | Within 24 hours<br>On day 3 (48-72 hours)<br>Between day 7 and 14<br>6 weeks                                                                                             |
| WHO [3]                                                                                                 | 2015<br>Pregnancy, Childbirth, Postpartum<br>and Newborn Care: A guide for<br>essential practice   | +                                                                                                     | +         | Not given         | 6 weeks        | Within 24 hours after childbirth.<br>Day 3 (48-72 hours)<br>Between day 7 and 14<br>Clinic visit: 6 weeks                                                                |
| WHO [4]                                                                                                 | 2013<br>Counselling for maternal and<br>newborn health care: a handbook<br>for building skills     | +                                                                                                     | +         | Not given         | 6 weeks        | Within 24 hours, first visit (could be a<br>home visit)<br>Within 1 week, preferably on day 3<br>Second visit 7-14 days after birth<br>Third visit 4-6 weeks after birth |

| International body/country and Institution | Year of publication of the latest guideline/ Position Paper/ Strategy                      | Use of 'Postpartum' or 'Postnatal' term to refer to care/ services for the mother following delivery* |           | Postpartum length                    | Service length | Service frequency                                              |
|--------------------------------------------|--------------------------------------------------------------------------------------------|-------------------------------------------------------------------------------------------------------|-----------|--------------------------------------|----------------|----------------------------------------------------------------|
|                                            |                                                                                            | Postpartum                                                                                            | Postnatal |                                      |                |                                                                |
| WHO [5]                                    | 2013<br>WHO recommendations on Postnatal care of the mother and newborn                    | +                                                                                                     | +         | Days and weeks following child birth | 6 weeks        | Within 24 hours<br>Day 3 (48-72 hours)<br>7-14 days<br>6 weeks |
| WHO [6]                                    | 2010<br>WHO Technical Consultation on Postpartum and Postnatal Care                        | +                                                                                                     | +         | 6 weeks                              | 6 weeks        | Within one hour<br>72 hours<br>10-14 days<br>6-8 weeks         |
| WHO [7]                                    | 2009<br>WHO Recommended Interventions for Improving Maternal and Newborn Health            | +                                                                                                     | +         | Not given                            | 6 weeks        | Not given                                                      |
| WHO [8]                                    | 2003<br>Pregnancy, Childbirth, Postpartum and Newborn Care: A guide for essential practice | +                                                                                                     | +         | Not given                            | 6 weeks        | Within 1st week, preferably within 2-3 days<br>4-6 weeks       |
| WHO [9]                                    | 1998<br>Postpartum care of the mother and newborn : a practical guide                      | +                                                                                                     | +         | 6 weeks                              | 6 weeks        | 6 hours (6-12 hrs)<br>6 days (3-6 days)<br>6 weeks<br>6 months |
| WHO [10]                                   | 1996<br>Mother-Baby Package: Implementing safe motherhood in countries                     | +                                                                                                     | -         | Not given                            | Not given      | Not given                                                      |

| International body/country and Institution                                                            | Year of publication of the latest guideline/ Position Paper/ Strategy                                  | Use of 'Postpartum' or 'Postnatal' term to refer to care/ services for the mother following delivery* |           | Postpartum length | Service length | Service frequency                                                                                                                       |
|-------------------------------------------------------------------------------------------------------|--------------------------------------------------------------------------------------------------------|-------------------------------------------------------------------------------------------------------|-----------|-------------------|----------------|-----------------------------------------------------------------------------------------------------------------------------------------|
|                                                                                                       |                                                                                                        | Postpartum                                                                                            | Postnatal |                   |                |                                                                                                                                         |
| <b>WHO [11]</b>                                                                                       | <b>1976</b><br>New Trends and Approaches in the Delivery of Maternal and Child Care in Health Services | -                                                                                                     | +         | Not given         | Not given      | not given                                                                                                                               |
| <b>Australia [12]</b><br>Council of Australian Governments                                            | <b>2019</b><br>Woman-centred care Strategic directions for Australian maternity services               | -                                                                                                     | +         | Not given         | 52 weeks       | Not given                                                                                                                               |
| <b>Canada [13]</b><br>Public Health Agency of Canada                                                  | <b>2020</b><br>Family-Centred Maternity and Newborn Care: National Guidelines                          | +                                                                                                     | +         | Not given         | 6 weeks        | National uniformity is not present with each province determining its postpartum care plan                                              |
| <b>India [14]</b><br>National Rural Health Mission                                                    | <b>2021</b><br>Induction Training Module for ASHAs                                                     | -                                                                                                     | +         | Not given         | 6 weeks        | For home delivery visits on days - 1, 3, 7, 14, 21, 28, and 42.<br>For institutional delivery visits on days - 3, 7, 14, 21, 28, and 42 |
| <b>India [15]</b><br>Ministry of Health and Welfare                                                   | <b>2018</b><br>Guidelines on midwifery services in India 2018                                          | +                                                                                                     | +         | Not given         | 6 weeks        | Not given                                                                                                                               |
| <b>India [16]</b><br>Maternal Health Division Ministry of Health & Family Welfare Government of India | <b>2013</b><br>Maternal and Newborn Health Toolkit                                                     | +                                                                                                     | +         | Not given         | Not given      | Not given                                                                                                                               |

| International body/country and Institution                                                                    | Year of publication of the latest guideline/ Position Paper/ Strategy                                                              | Use of 'Postpartum' or 'Postnatal' term to refer to care/ services for the mother following delivery* |           | Postpartum length | Service length | Service frequency                                                                                                                                         |
|---------------------------------------------------------------------------------------------------------------|------------------------------------------------------------------------------------------------------------------------------------|-------------------------------------------------------------------------------------------------------|-----------|-------------------|----------------|-----------------------------------------------------------------------------------------------------------------------------------------------------------|
|                                                                                                               |                                                                                                                                    | Postpartum                                                                                            | Postnatal |                   |                |                                                                                                                                                           |
| <b>India [17]</b><br>Maternal Health Division<br>Ministry of Health and Family Welfare<br>Government of India | <b>2010</b><br>Guidelines for Antenatal Care and Skilled Attendance at Birth                                                       | +                                                                                                     | +         | Not given         | 6 weeks        | First visit 1st day (within 24 hours)<br>Second visit 3rd day after delivery<br>Third visit 7th day after delivery<br>Fourth visit 6 weeks after delivery |
| <b>India [18]</b><br>Ministry of Health and Welfare                                                           | <b>2009</b><br>Trainers' Guide for Training of Medical Officers in Pregnancy Care and Management of Common Obstetric Complications | +                                                                                                     | +         | Not given         | Not given      | Not given                                                                                                                                                 |
| <b>South Africa [19]</b><br>Department of Health                                                              | <b>2021</b><br>South African maternal, perinatal, and neonatal Health Policy                                                       | +                                                                                                     | +         | Not given         | Not given      | Not given                                                                                                                                                 |
| <b>South Africa [20]</b>                                                                                      | <b>2023</b><br>Saving Mothers and Babies 2017-2019:<br>Executive Summary                                                           | +                                                                                                     | +         | Not given         | Not given      | Not given                                                                                                                                                 |
| <b>South Africa [21]</b><br>Department of Health                                                              | <b>2016</b><br>Guidelines for Maternity Care                                                                                       | +                                                                                                     | +         | Not given         | 6 weeks        | Immediately<br>3 to 6 days<br>6 weeks                                                                                                                     |
| <b>South Africa [22]</b><br>Department of Health                                                              | <b>N/A</b><br>Maternal Child and Women's Health Draft Policy Document                                                              | +                                                                                                     | +         | Not given         | Not given      | Not given                                                                                                                                                 |

| International body/country and Institution                                                  | Year of publication of the latest guideline/ Position Paper/ Strategy          | Use of 'Postpartum' or 'Postnatal' term to refer to care/ services for the mother following delivery* |           | Postpartum length | Service length | Service frequency                                                                                                                          |
|---------------------------------------------------------------------------------------------|--------------------------------------------------------------------------------|-------------------------------------------------------------------------------------------------------|-----------|-------------------|----------------|--------------------------------------------------------------------------------------------------------------------------------------------|
|                                                                                             |                                                                                | Postpartum                                                                                            | Postnatal |                   |                |                                                                                                                                            |
| <b>United Kingdom [23]</b><br>NICE & The Royal College of Obstetricians and Gynaecologists  | <b>2021</b><br>Postnatal care                                                  | +                                                                                                     | +         | Not given         | 8 weeks        | Within 36 hours after discharge<br>Health worker home visit within 7-14 days<br>6-8 weeks by GP                                            |
| <b>United Kingdom [24]</b><br>NICE & The Royal College of Obstetricians and Gynaecologists  | <b>2006</b><br>Postnatal care up to 8 weeks after birth                        | -                                                                                                     | +         | Not given         | 8 weeks        | 6-8 weeks health screening                                                                                                                 |
| <b>United States of America [25]</b><br>White House                                         | <b>2022</b><br>White House blueprint for addressing the maternal health crisis | +                                                                                                     | +         | Not given         | Not given      | Not given                                                                                                                                  |
| <b>United States of America [26]</b><br>American College of Obstetricians and Gynecologists | <b>2018</b><br>Optimizing Postpartum Care                                      | +                                                                                                     | -         | Not given         | 12 weeks       | Blood pressure check- 3-10 days<br>High-risk contacts: 1-3 weeks<br>If necessary: 3-12 weeks<br>4-12 weeks- comprehensive postpartum visit |

\*OECD- Organisation for Economic Co-operation and Development, G 20- Group of 20, FIGO- International Federation of Gynaecology and Obstetrics, WHO- World Health Organisation

No :- Yes : +

## References for Supplementary Table 1

1. Obstetrics and Gynaecology European Board and College of Obstetric and Neonatal Services. Standards of Care for Obstetric and Neonatal Services. Belgium: Obstetrics and Gynaecology European Board and College of Obstetric and Neonatal Services; 2014. <https://eeca.unfpa.org/en/publications/EuropeanSRHStandardsRU>
2. World Health Organization. WHO recommendations on maternal and newborn care for a positive postnatal experience. Geneva: World Health Organization; 2022. <https://www.who.int/publications/i/item/9789240045989>
3. World Health Organization. Pregnancy, Childbirth, Postpartum and Newborn Care: A guide for essential practice. 3 ed. Geneva: World Health Organization & UNICEF; 2015. <https://www.who.int/publications/i/item/9789241549356>
4. Department of Maternal Newborn Child and Adolescent Health. Counselling for maternal and newborn health care: a handbook for building skills. Geneva: World Health Organization; 2013. <https://apps.who.int/iris/handle/10665/44016>
5. World Health Organization. WHO recommendations on Postnatal care of the mother and newborn. Geneva: World Health Organization; 2013. <https://apps.who.int/iris/handle/10665/97603>
6. Department of Making Pregnancy Safer. WHO Technical Consultation on Postpartum and Postnatal Care. Geneva: World Health Organization; 2010. <https://apps.who.int/iris/handle/10665/70432>
7. Department of Making Pregnancy Safer. WHO Recommended Interventions for Improving Maternal and Newborn Health. 2 ed. Geneva: World Health Organization; 2009. [https://apps.who.int/iris/bitstream/handle/10665/69509/WHO\\_MPS\\_07.05\\_eng.pdf;sequence=1](https://apps.who.int/iris/bitstream/handle/10665/69509/WHO_MPS_07.05_eng.pdf;sequence=1)
8. World Health Organization. Pregnancy, Childbirth, Postpartum and Newborn Care: A guide for essential practice. 1 ed. Geneva: World Health Organization; 2003. [https://www.jica.go.jp/Resource/project/philippines/0600894/04/pdf/pcpnc\\_who.pdf](https://www.jica.go.jp/Resource/project/philippines/0600894/04/pdf/pcpnc_who.pdf)
9. World Health Organization. Postpartum care of the mother and newborn : a practical guide. Geneva: World Health Organization; 1998. <https://apps.who.int/iris/handle/10665/66439>
10. Division of Family Health. Mother-Baby Package: Implementing safe motherhood in countries. Geneva: World Health Organization; 1996. <https://www.who.int/publications/i/item/WHO-FHE-MSM-94.11-Rev.1>
11. World Health Organization. New Trends and Approaches in the Delivery of Maternal and Child Care in Health Services. Geneva: World Health Organization; 1976. <https://apps.who.int/iris/handle/10665/41219>
12. Department of Health and Aged Care. Woman-centred care, Strategic directions for Australian maternity services. Canberra: Council of Australian Governments 2019. <https://www.health.gov.au/resources/publications/woman-centred-care-strategic-directions-for-australian-maternity-services?language=und>
13. Public Health Agency of Canada. Chapter 5 Postpartum Care. Family-Centred Maternity and Newborn Care National Guidelines. Ottawa: Public Health Agency of Canada; 2020: 1-75. <https://www.canada.ca/en/public-health/services/maternity-newborn-care-guidelines.html>
14. National Rural Health Mission. Induction Training Module for ASHAs. New Delhi: National Rural Health Mission; 2021. [https://nhm.gov.in/images/pdf/communitisation/asha/ASHA\\_Induction\\_Module\\_English.pdf](https://nhm.gov.in/images/pdf/communitisation/asha/ASHA_Induction_Module_English.pdf)
15. National Health Mission. Guidelines on Midwifery Services in India. New Delhi: Ministry of Health and Family Welfare; 2018. [https://nhm.gov.in/New\\_Updates\\_2018/NHM\\_Components/RMNCHA/MH/Guidelines/Guidelines\\_on\\_Midwifery\\_Services\\_in\\_India.pdf](https://nhm.gov.in/New_Updates_2018/NHM_Components/RMNCHA/MH/Guidelines/Guidelines_on_Midwifery_Services_in_India.pdf)
16. Maternal Health Division. Maternal and Newborn Health Toolkit. New Delhi: Ministry of Health and Family Welfare; 2013. [http://www.dkhfw.in/wp-content/uploads/2017/07/Maternal\\_Newborn\\_Health\\_Toolkit.pdf](http://www.dkhfw.in/wp-content/uploads/2017/07/Maternal_Newborn_Health_Toolkit.pdf)
17. Maternal Health Division. Guidelines for Antenatal Care and Skilled Attendance at Birth. New Delhi: Ministry of Health and Family Welfare; 2010. [https://nhm.gov.in/images/pdf/programmes/maternal-health/guidelines/sba\\_guidelines\\_for\\_skilled\\_attendance\\_at\\_birth.pdf](https://nhm.gov.in/images/pdf/programmes/maternal-health/guidelines/sba_guidelines_for_skilled_attendance_at_birth.pdf)
18. Maternal Health Division. Trainers' Guide for Training of Medical Officers in Pregnancy Care and Management of Common Obstetric Complications. New Delhi: Ministry of Health and Family Welfare; 2009. [https://nhm.gov.in/images/pdf/programmes/maternal-health/guidelines/trainees\\_guide\\_for\\_training\\_of\\_mos\\_in\\_preg\\_care.pdf](https://nhm.gov.in/images/pdf/programmes/maternal-health/guidelines/trainees_guide_for_training_of_mos_in_preg_care.pdf)
19. South African Maternal, Perinatal and Neonatal Health Policy. Pretoria: South African National Department of Health; 2021. <https://knowledgehub.health.gov.za/elibrary/south-african-maternal-perinatal-and-neonatal-health->

[policy#:~:text=The%20policy%20focusses%20on%20the.access%20to%20post%2Ddelivery%20contraception.](#)

20. Saving Mothers and Babies 2017-2019: Executive Summary. Pretoria: National Department of Health; 2023. <https://www.health.gov.za/wp-content/uploads/2023/05/SAVING-MOTHERS-SAVING-BABIES-REPORT-2017-2019.pdf>
21. Department of Health Republic of South Africa. Guidelines for Maternity Care. 4 ed. South Africa: Department of Health, Republic of South Africa; 2016. <https://knowledgehub.health.gov.za/elibrary/guidelines-maternity-care-south-africa-2016>
22. Maternal Child and Women's Health Draft Policy Document. Pretoria: Department of Health. [https://www.gov.za/sites/default/files/gcis\\_document/201409/childwomenhealth0.pdf](https://www.gov.za/sites/default/files/gcis_document/201409/childwomenhealth0.pdf)
23. National Institute for Health Care Excellence and The Royal College of Obstetricians and Gynaecologists. Postnatal care. United Kingdom: National Institute for Health and Care Excellence and The Royal College of Obstetricians and Gynaecologists; 2021. <https://www.nice.org.uk/guidance/ng194>
24. Postnatal care up to 8 weeks after birth. London: National Institute for Health and Care Excellence; 2006. <https://www.northernlms.org/wp-content/uploads/2020/04/NICE-Guidance-Postnatal-Care.pdf>
25. White House Blueprint for Addressing the Maternal Health Crisis. Washington: The White House; 2022. <https://www.whitehouse.gov/wp-content/uploads/2022/06/Maternal-Health-Blueprint.pdf>
26. Stuebe A, Auguste T, Gulati M. Optimizing postpartum care. ACOG Committee Opinion No. 736. *Obstetrics & Gynecology* 2018; **131**(5): e140. <https://www.acog.org/clinical/clinical-guidance/committee-opinion/articles/2018/05/optimizing-postpartum-care>
